# Supplementary material for: Mobility and COVID-19 in Andorra: Country-scale analysis of high-resolution mobility patterns and infection spread
Source: bioRxiv or medRxiv preprint supplement (doi:10.1101/2021.02.18.21251977), 2021-02-24
Supplement: Supplementary file [file media-1.pdf]

## 7 Supplementary Material

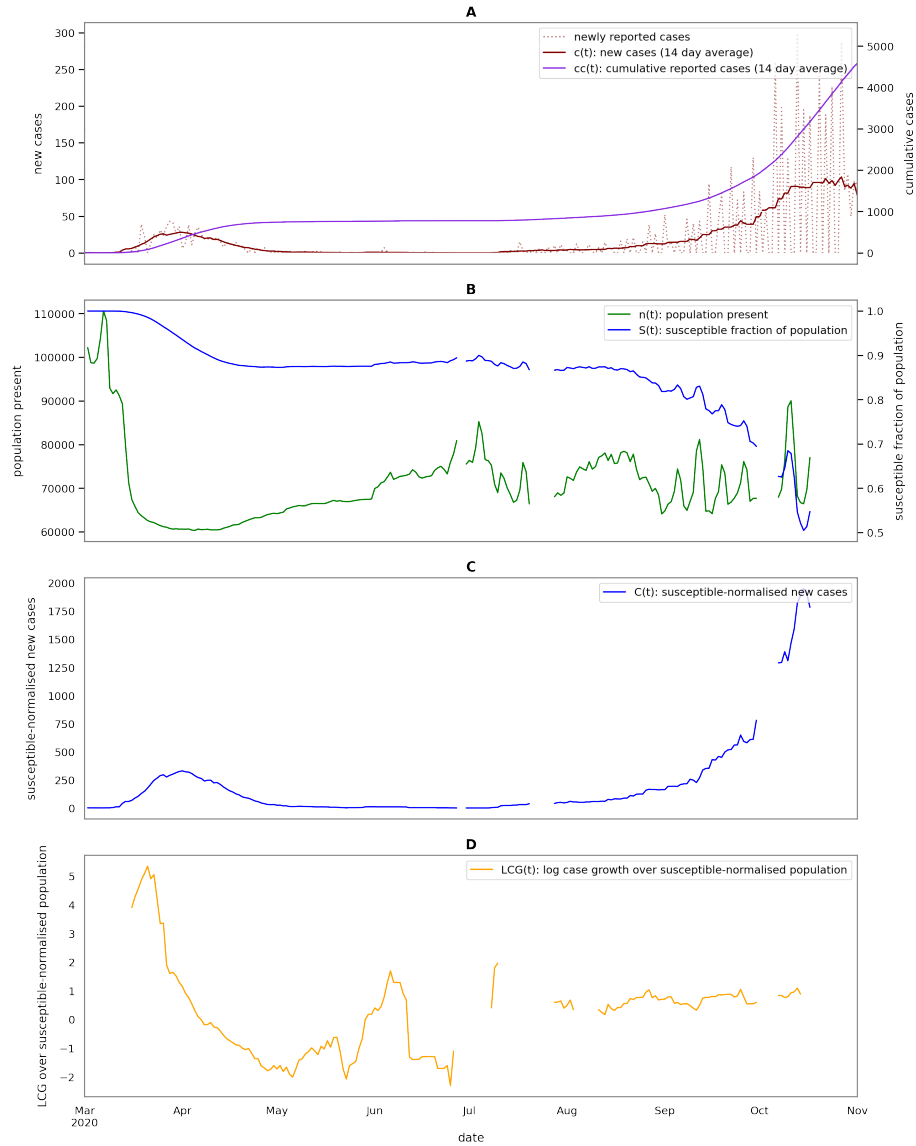

Figure 7.13:  $LCG(t)$  as well as variables used in the calculation, as described in section 4.3.1: (A) Newly reported cases (not smoothed),  $c(t)$ : newly reported cases (14 day rolling average),  $cc(t)$ : cumulative reported cases (14 day rolling average), (B)  $n(t)$ : population present,  $S(t)$ : susceptible fraction of the population, (C)  $C(t)$ : The susceptible-normalised new cases per day, (D)  $LCG(t)$ : log of the growth in daily susceptible-normalised new cases since the 14 days prior.

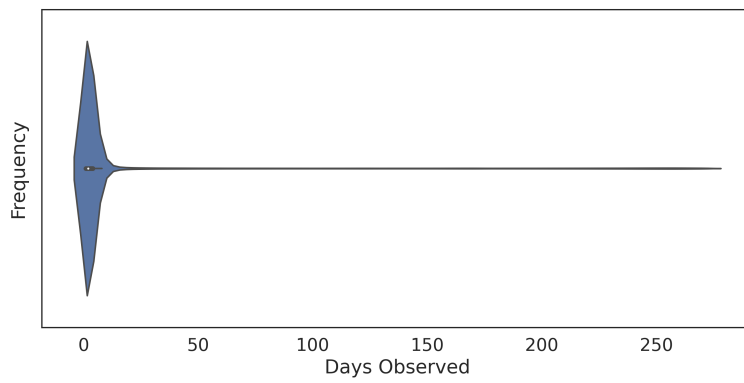

Figure 7.14: Distribution of number of days observed by subscriber. The distribution is dominated by tourists who significantly outnumber residents.

| lag | indoor<br>interac-<br>tion<br>poten-<br>tial | outdoor<br>interac-<br>tion<br>poten-<br>tial | people<br>making<br>trips<br>be-<br>tween<br>parishes | total<br>trips<br>be-<br>tween<br>parishes | fraction<br>of<br>people<br>not<br>staying<br>home | people<br>making<br>trips | total<br>trips | country<br>en-<br>trances |
|-----|----------------------------------------------|-----------------------------------------------|-------------------------------------------------------|--------------------------------------------|----------------------------------------------------|---------------------------|----------------|---------------------------|
| -30 | 0.592                                        | 0.653                                         | 0.602                                                 | 0.57                                       | 0.376                                              | 0.489                     | 0.301          | 0.721                     |
| -29 | 0.619                                        | 0.679                                         | 0.631                                                 | 0.598                                      | 0.405                                              | 0.513                     | 0.338          | 0.724                     |
| -28 | 0.637                                        | 0.698                                         | 0.65                                                  | 0.624                                      | 0.425                                              | 0.529                     | 0.367          | 0.724                     |
| -27 | 0.655                                        | 0.714                                         | 0.663                                                 | 0.644                                      | 0.438                                              | 0.541                     | 0.394          | 0.718                     |
| -26 | 0.664                                        | 0.722                                         | 0.67                                                  | 0.659                                      | 0.441                                              | 0.541                     | 0.414          | 0.707                     |
| -25 | 0.671                                        | 0.723                                         | 0.674                                                 | 0.67                                       | 0.446                                              | 0.538                     | 0.425          | 0.69                      |
| -24 | 0.682                                        | 0.723                                         | 0.68                                                  | 0.68                                       | 0.458                                              | 0.54                      | 0.436          | 0.67                      |
| -23 | 0.696                                        | 0.726                                         | 0.688                                                 | 0.691                                      | 0.475                                              | 0.547                     | 0.449          | 0.653                     |
| -22 | 0.712                                        | 0.726                                         | 0.693                                                 | 0.697                                      | 0.491                                              | 0.554                     | 0.461          | 0.637                     |
| -21 | 0.731                                        | 0.727                                         | 0.699                                                 | 0.7                                        | 0.508                                              | 0.563                     | 0.47           | 0.627                     |
| -20 | 0.746                                        | 0.726                                         | 0.706                                                 | 0.701                                      | 0.524                                              | 0.573                     | 0.48           | 0.619                     |
| -19 | 0.758                                        | 0.723                                         | 0.713                                                 | 0.705                                      | 0.537                                              | 0.583                     | 0.487          | 0.613                     |
| -18 | 0.762                                        | 0.712                                         | 0.713                                                 | 0.703                                      | 0.542                                              | 0.591                     | 0.489          | 0.607                     |
| -17 | 0.759                                        | 0.699                                         | 0.701                                                 | 0.693                                      | 0.533                                              | 0.594                     | 0.483          | 0.601                     |
| -16 | 0.747                                        | 0.681                                         | 0.672                                                 | 0.668                                      | 0.508                                              | 0.585                     | 0.469          | 0.59                      |
| -15 | 0.729                                        | 0.658                                         | 0.639                                                 | 0.637                                      | 0.476                                              | 0.571                     | 0.448          | 0.58                      |
| -14 | 0.711                                        | 0.636                                         | 0.613                                                 | 0.613                                      | 0.449                                              | 0.557                     | 0.429          | 0.567                     |
| -13 | 0.682                                        | 0.608                                         | 0.572                                                 | 0.574                                      | 0.402                                              | 0.527                     | 0.387          | 0.54                      |
| -12 | 0.66                                         | 0.588                                         | 0.532                                                 | 0.534                                      | 0.363                                              | 0.493                     | 0.344          | 0.509                     |
| -11 | 0.638                                        | 0.57                                          | 0.493                                                 | 0.499                                      | 0.326                                              | 0.458                     | 0.309          | 0.478                     |
| -10 | 0.605                                        | 0.54                                          | 0.448                                                 | 0.454                                      | 0.271                                              | 0.428                     | 0.266          | 0.451                     |
| -9  | 0.574                                        | 0.509                                         | 0.404                                                 | 0.413                                      | 0.223                                              | 0.397                     | 0.225          | 0.429                     |
| -8  | 0.548                                        | 0.482                                         | 0.362                                                 | 0.378                                      | 0.185                                              | 0.358                     | 0.187          | 0.407                     |
| -7  | 0.53                                         | 0.45                                          | 0.328                                                 | 0.351                                      | 0.161                                              | 0.323                     | 0.168          | 0.381                     |
| -6  | 0.509                                        | 0.415                                         | 0.293                                                 | 0.327                                      | 0.132                                              | 0.29                      | 0.141          | 0.359                     |
| -5  | 0.475                                        | 0.374                                         | 0.259                                                 | 0.304                                      | 0.101                                              | 0.258                     | 0.116          | 0.34                      |
| -4  | 0.451                                        | 0.34                                          | 0.228                                                 | 0.285                                      | 0.079                                              | 0.231                     | 0.098          | 0.319                     |
| -3  | 0.432                                        | 0.311                                         | 0.203                                                 | 0.271                                      | 0.065                                              | 0.205                     | 0.083          | 0.296                     |
| -2  | 0.408                                        | 0.284                                         | 0.186                                                 | 0.263                                      | 0.049                                              | 0.182                     | 0.065          | 0.277                     |
| -1  | 0.391                                        | 0.263                                         | 0.179                                                 | 0.26                                       | 0.04                                               | 0.162                     | 0.053          | 0.256                     |
| 0   | 0.371                                        | 0.242                                         | 0.164                                                 | 0.245                                      | 0.024                                              | 0.136                     | 0.033          | 0.239                     |
| 1   | 0.346                                        | 0.22                                          | 0.152                                                 | 0.22                                       | 0.006                                              | 0.102                     | 0.002          | 0.216                     |
| 2   | 0.324                                        | 0.199                                         | 0.144                                                 | 0.197                                      | -0.012                                             | 0.069                     | -0.023         | 0.196                     |
| 3   | 0.301                                        | 0.178                                         | 0.134                                                 | 0.18                                       | -0.031                                             | 0.036                     | -0.053         | 0.184                     |
| 4   | 0.274                                        | 0.157                                         | 0.12                                                  | 0.161                                      | -0.051                                             | -0.009                    | -0.097         | 0.168                     |
| 5   | 0.242                                        | 0.144                                         | 0.104                                                 | 0.138                                      | -0.074                                             | -0.052                    | -0.142         | 0.146                     |
| 6   | 0.21                                         | 0.128                                         | 0.09                                                  | 0.116                                      | -0.098                                             | -0.088                    | -0.185         | 0.137                     |
| 7   | 0.177                                        | 0.113                                         | 0.076                                                 | 0.094                                      | -0.117                                             | -0.116                    | -0.219         | 0.132                     |
| 8   | 0.142                                        | 0.099                                         | 0.058                                                 | 0.068                                      | -0.137                                             | -0.143                    | -0.247         | 0.124                     |
| 9   | 0.118                                        | 0.088                                         | 0.041                                                 | 0.047                                      | -0.158                                             | -0.165                    | -0.268         | 0.112                     |
| 10  | 0.087                                        | 0.074                                         | 0.018                                                 | 0.015                                      | -0.192                                             | -0.196                    | -0.302         | 0.103                     |
| 11  | 0.059                                        | 0.054                                         | -0.007                                                | -0.018                                     | -0.224                                             | -0.223                    | -0.331         | 0.088                     |
| 12  | 0.044                                        | 0.033                                         | -0.027                                                | -0.04                                      | -0.24                                              | -0.236                    | -0.34          | 0.079                     |
| 13  | 0.022                                        | 0.004                                         | -0.059                                                | -0.073                                     | -0.272                                             | -0.259                    | -0.358         | 0.079                     |
| 14  | 0.006                                        | -0.022                                        | -0.085                                                | -0.099                                     | -0.305                                             | -0.28                     | -0.374         | 0.087                     |
| 15  | -0.007                                       | -0.051                                        | -0.11                                                 | -0.119                                     | -0.332                                             | -0.295                    | -0.384         | 0.1                       |
| 16  | -0.016                                       | -0.081                                        | -0.132                                                | -0.139                                     | -0.355                                             | -0.304                    | -0.393         | 0.113                     |
| 17  | -0.015                                       | -0.102                                        | -0.147                                                | -0.151                                     | -0.361                                             | -0.309                    | -0.392         | 0.125                     |
| 18  | -0.021                                       | -0.12                                         | -0.162                                                | -0.164                                     | -0.376                                             | -0.322                    | -0.402         | 0.144                     |
| 19  | -0.022                                       | -0.126                                        | -0.167                                                | -0.167                                     | -0.39                                              | -0.319                    | -0.405         | 0.162                     |
| 20  | -0.014                                       | -0.134                                        | -0.161                                                | -0.163                                     | -0.389                                             | -0.303                    | -0.394         | 0.169                     |
| 21  | 0.0                                          | -0.145                                        | -0.154                                                | -0.155                                     | -0.378                                             | -0.284                    | -0.374         | 0.168                     |
| 22  | 0.016                                        | -0.153                                        | -0.141                                                | -0.141                                     | -0.362                                             | -0.269                    | -0.355         | 0.158                     |
| 23  | 0.03                                         | -0.163                                        | -0.13                                                 | -0.128                                     | -0.351                                             | -0.258                    | -0.338         | 0.151                     |
| 24  | 0.039                                        | -0.173                                        | -0.114                                                | -0.118                                     | -0.339                                             | -0.243                    | -0.321         | 0.148                     |
| 25  | 0.042                                        | -0.18                                         | -0.102                                                | -0.107                                     | -0.325                                             | -0.226                    | -0.301         | 0.147                     |
| 26  | 0.047                                        | -0.181                                        | -0.09                                                 | -0.098                                     | -0.313                                             | -0.219                    | -0.287         | 0.155                     |
| 27  | 0.056                                        | -0.182                                        | -0.073                                                | -0.081                                     | -0.284                                             | -0.208                    | -0.262         | 0.163                     |
| 28  | 0.063                                        | -0.178                                        | -0.057                                                | -0.067                                     | -0.256                                             | -0.201                    | -0.24          | 0.173                     |
| 29  | 0.068                                        | -0.178                                        | -0.043                                                | -0.057                                     | -0.234                                             | -0.194                    | -0.219         | 0.175                     |
| 30  | 0.063                                        | -0.183                                        | -0.045                                                | -0.063                                     | -0.226                                             | -0.208                    | -0.21          | 0.173                     |

Table 3: The correlations between the daily time series of 8 mobility metrics and lagged log case growth (LCG). LCG is shifted by lags ranging from -30 to 30 days.
